# Supplementary material for: Green Fractionation Approaches for the Integrated Upgrade of Corn Cobs
Source: MDPI journal article supplement (doi:10.3390/chemengineering7020035), 2023-04-12
Supplement: s1 [file s1]

## Supplementary Materials

# Green Fractionation Approaches for the Integrated Upgrade of Corn Cobs

João Fialho, Patrícia Moniz, Luís C. Duarte and Florbela Carvalheiro \*

LNEG, Laboratório Nacional de Energia e Geologia, Unidade de Bioenergia e Biorrefinarias,  
Estrada do Paço do Lumiar 22, 1649-038 Lisboa, Portugal

\* Correspondence: florbela.carvalheiro@lneg.pt; Tel.: +351-21-0924713

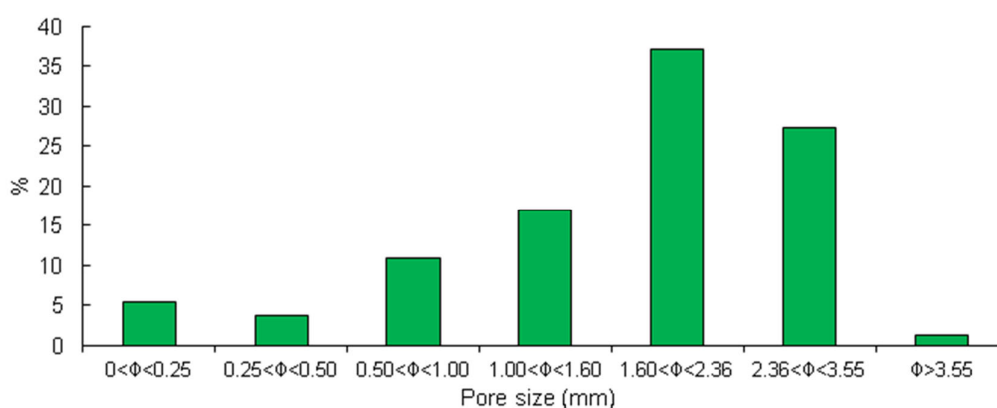

**Figure S1.** Particle size distribution for corn cobs.

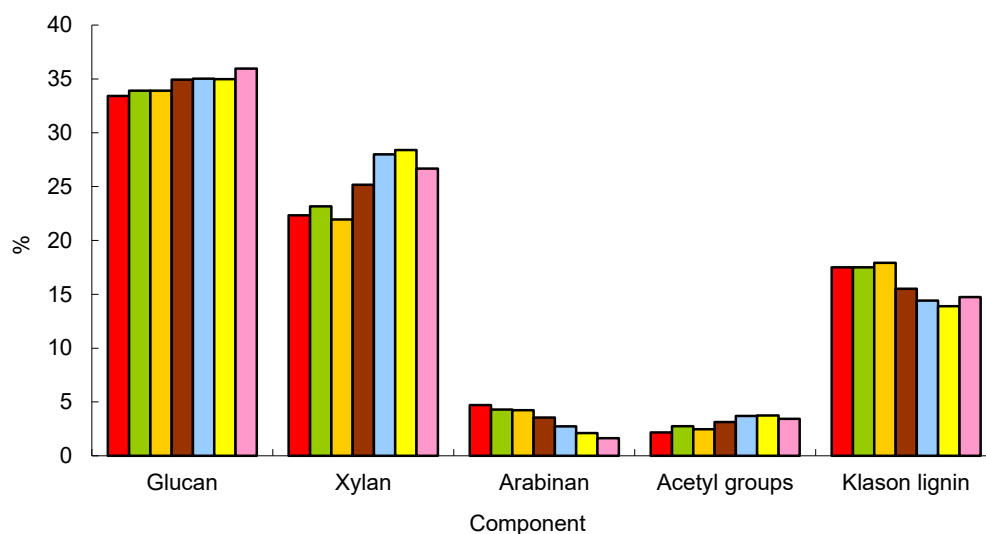

**Figure S2.** Chemical composition of the different corn cobs fractions (■ 0 <  $\Phi$  < 0.25; ■ 0.25 <  $\Phi$  < 0.50; ■ 0.50 <  $\Phi$  < 1.00; ■ 1.00 <  $\Phi$  < 1.60; ■ 1.60 <  $\Phi$  < 2.36; ■ 2.36 <  $\Phi$  < 3.55; ■  $\Phi$  > 3.55).

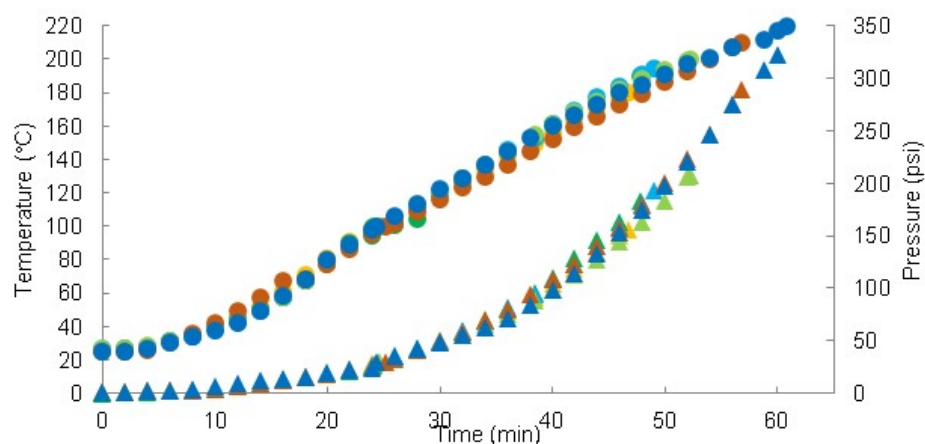

**Figure S3.** Temperature (●) and pressure (▲) profiles for the autohydrolysis of corn cobs at 180°C (●, ▲), 190°C (●, ▲), 195°C (●, ▲), 200°C (●, ▲), 210°C (●, ▲) and 220°C (●, ▲). Data for isothermal operation period are not shown.

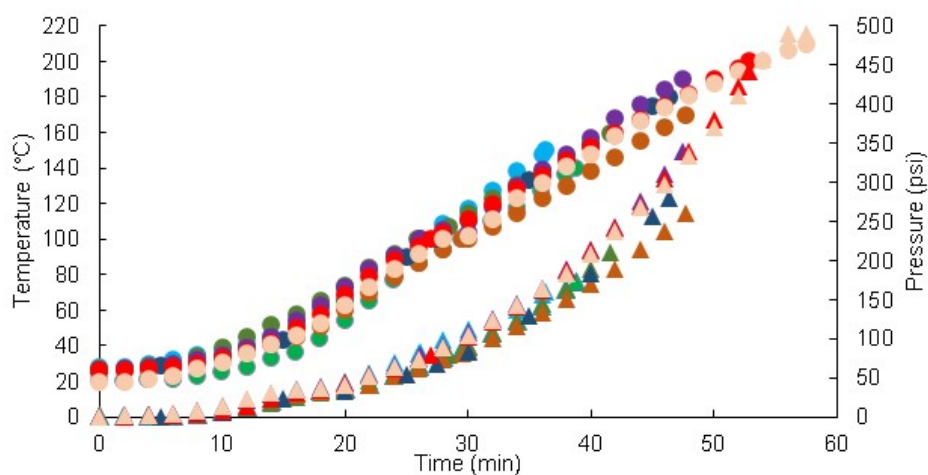

**Figure S4.** Temperature (●) and pressure (▲) profiles for the organosolv fractionation of corn cobs at 140°C (●, ▲), 150°C (●, ▲), 160°C (●, ▲), 170°C (●, ▲), 180°C (●, ▲), 190°C (●, ▲), 200°C (●, ▲) and 210°C (●, ▲). Data for isothermal operation period are not shown.
